# Supplementary material for: Mendelian randomization analysis revealed a gut microbiota–mammary axis in breast cancer
Source: Frontiers journal article supplement (doi:10.3389/fmicb.2023.1193725), 2023-08-23

Supplementary Figure 2. Funnel plot showing symmetry of causal effects of SNPs representing gut microbiota on 2 types of breast cancer, including (A) Genus\_Sellimonas and (B) Genus\_Adlercreutzia on ER+ breast cancer; (C) Genus\_Ruminococcus2 and (D) Genus\_Erysipelatoclostridium on Her2+ breast cancer.

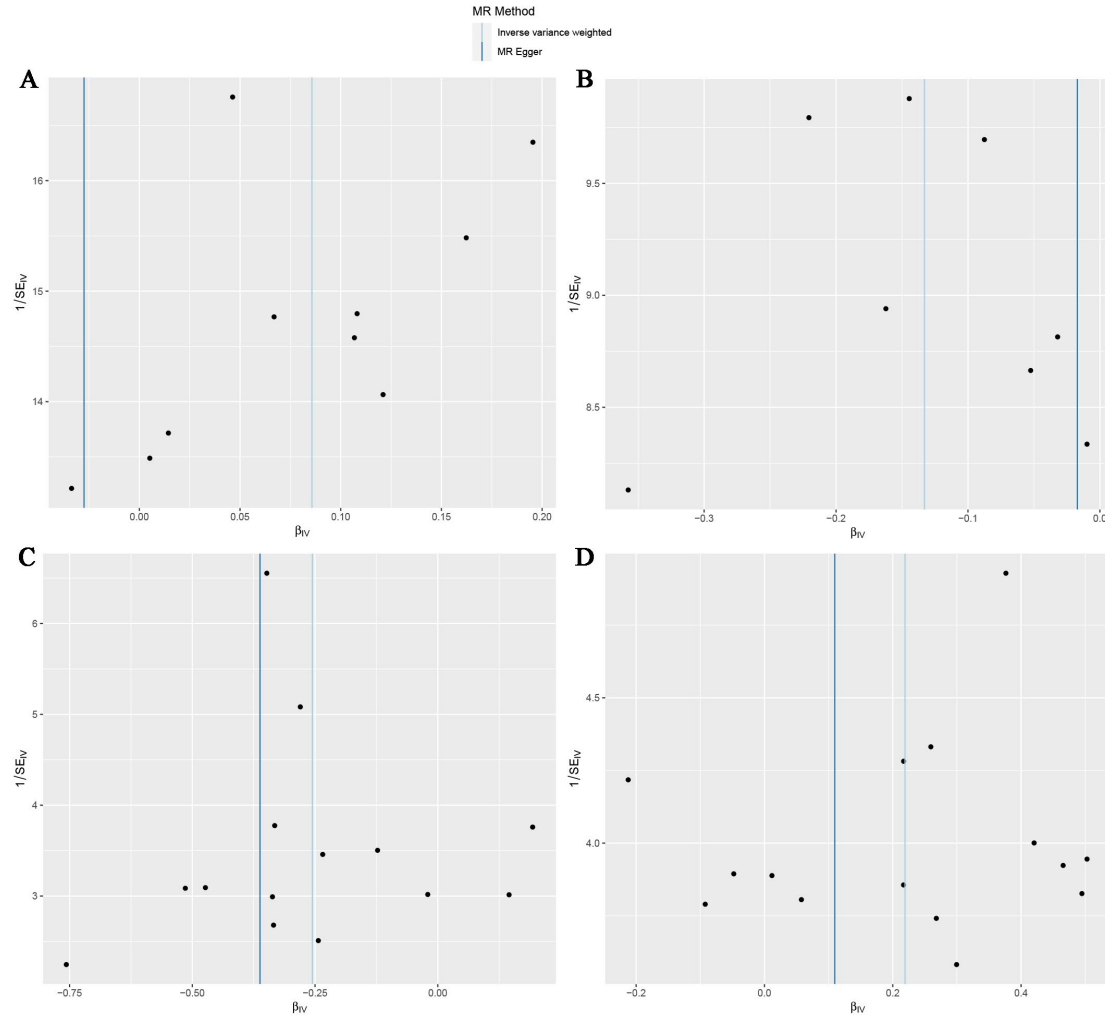

Supplement: Image_2.pdf [file Image_2.pdf]
